# Supplementary material
Source: PubMed Central journal article supplement (PMC5473720)
Supplement: mmc1.pdf [file mmc1.pdf]

**The American Journal of Human Genetics, Volume 100**

## **Supplemental Data**

### **Mutations in *KDSR* Cause Recessive**

### **Progressive Symmetric Erythrokeratoderma**

**Lynn M. Boyden, Nicholas G. Vincent, Jing Zhou, Ronghua Hu, Brittany G. Craiglow, Susan J. Bayliss, Ilana S. Rosman, Anne W. Lucky, Luis A. Diaz, Lowell A. Goldsmith, Amy S. Paller, Richard P. Lifton, Susan J. Baserga, and Keith A. Choate**

**Figure S1. Sanger sequencing confirmation of *KDSR* mutations and aberrant splicing**

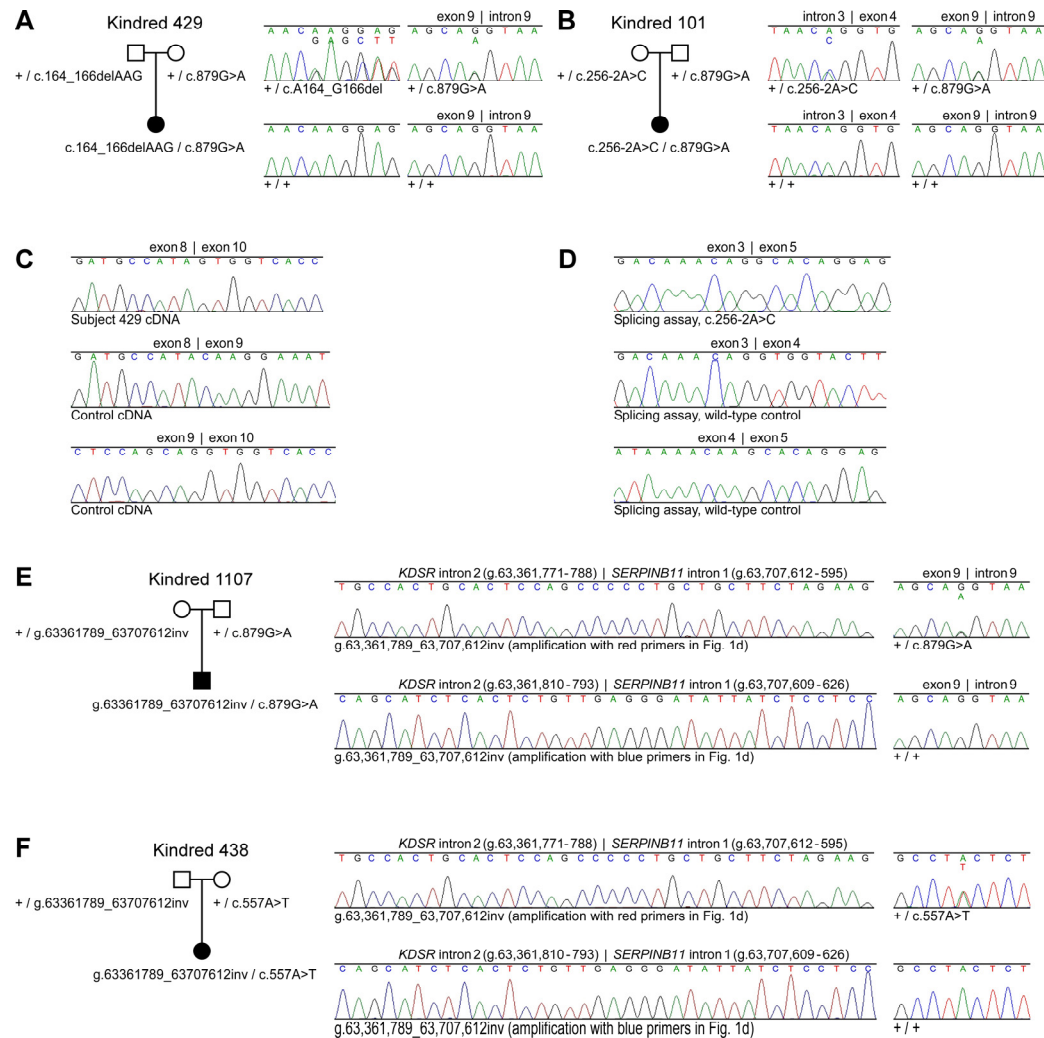

In pedigree drawings, subjects are denoted with black (affected) and white (unaffected) symbols. *KDSR* alleles are denoted as ‘+’ (wild-type) or by the sequence change. Genomic base position is the hg38 version of the human genome.

(A) Subject 429 is compound heterozygous for *KDSR* mutations c.164\_166delAAG and c.879G>A.

(B) Subject 101 is compound heterozygous for *KDSR* mutations c.256-2A>C and c.879G>A.

(C) Reverse transcription and amplification of RNA from Subject 429, and gel isolation of the smaller band (Figure 1A), shows *KDSR* mutation c.879G>A results in skipping of exon 9.

(D) Reverse transcription and amplification of RNA from cells transfected with a *KDSR* c.256-2A>C mutation construct shows skipping of exon 4.

(E) Subject 1107 is compound heterozygous for a 346 bp inversion on chromosome 18 (g.63,361,789\_63,707,612inv), which disrupts the 5’ end of *KDSR*, and mutation c.879G>A.

(F) Subject 438 is compound heterozygous for a 346 bp inversion on chromosome 18 (g.63,361,789\_63,707,612inv), which disrupts the 5’ end of *KDSR*, and mutation c.557A>T.

Note in (E-F) that at the distal junction of the inversion g.63,361,789-792 is lost and g.63,707,609-612 is retained.

**Figure S2. Identification of a 346 kb inversion affecting the 5' end of *KDSR* by genome sequencing**

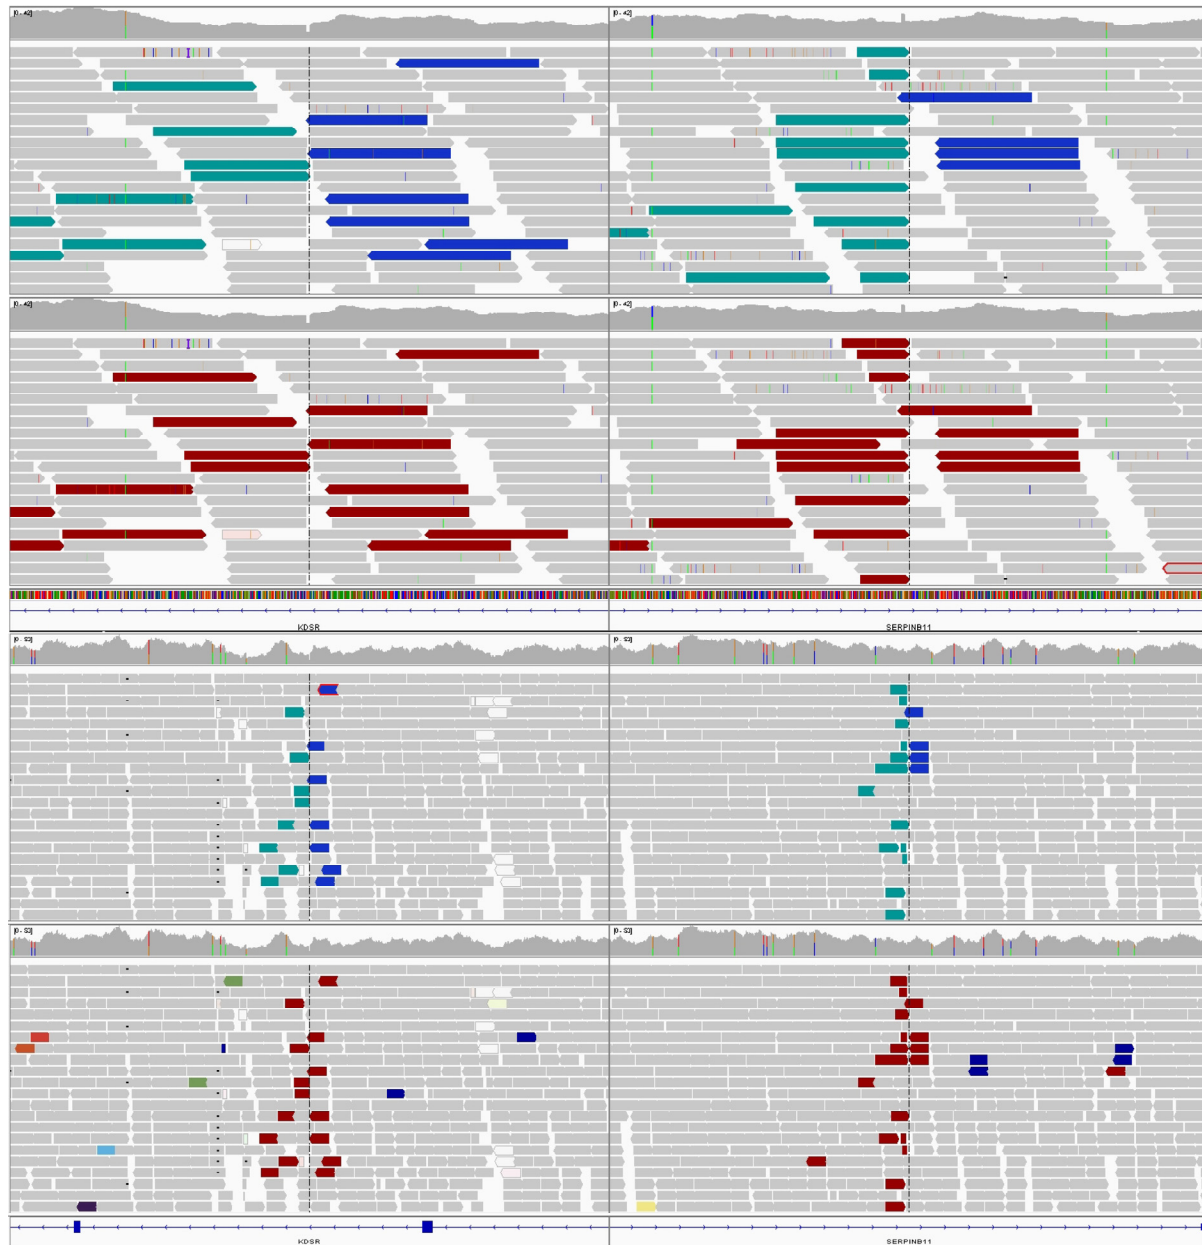

Screen captures from the Broad Institute Integrative Genomics Viewer (IGV) depict aligned reads from the genome sequence of Subject 1107 at 650 bp (top panel) and 5 kb (bottom panel) resolution. Aligned reads on chromosome 18 (arrows) are color-coded from the usual gray to indicate deviations from expected orientation (aqua and blue, top sub-panels) or insert size (dark red, bottom sub-panels), based on the reads' paired-ends. Reads within intron 2 of *KDSR* (left panels) and within intron 1 of *SERPINB11* (right panels) are shown (with clipping at panel borders). The presence of multiple reads with reversed orientation and a much greater than expected insert size with paired-ends at both of these locations is indicative of an inversion between the sites (g.63,361,789\_63,707,612inv), which was confirmed by PCR (Figure 1D-E) and Sanger sequencing (Figure S1E-F).

**Figure S3. Sequence alignment of KDSR orthologs**

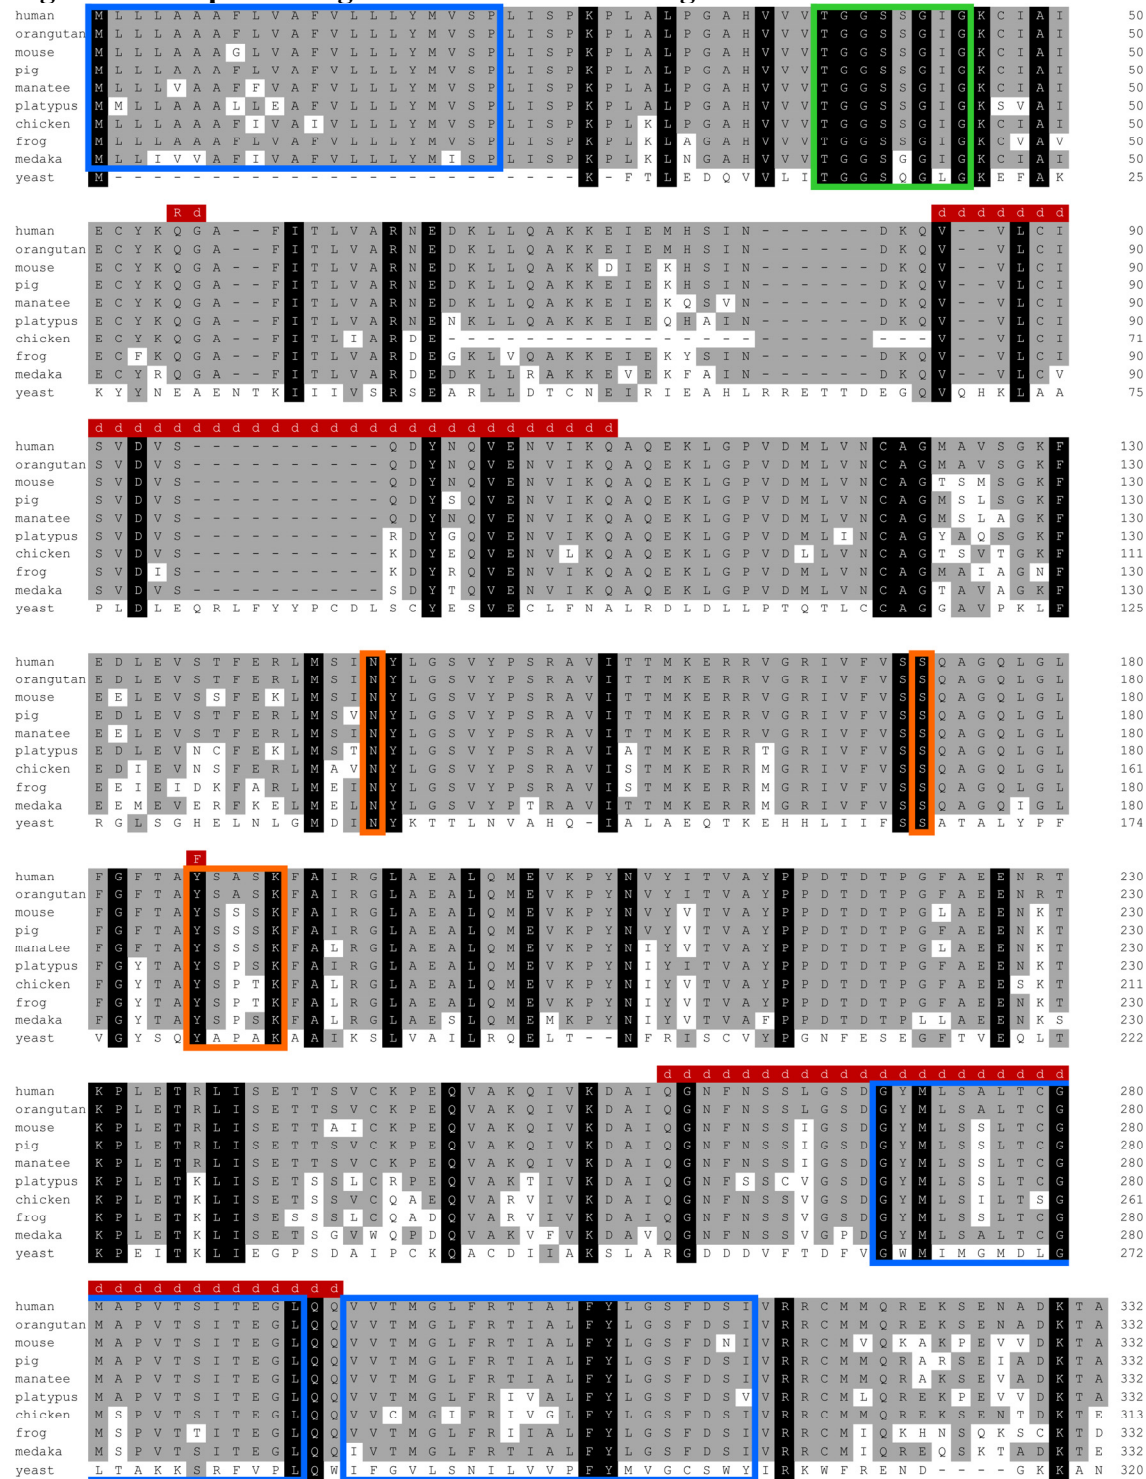

Completely conserved residues are shaded black; other residues conserved with human KDSR are shaded gray. Mutations in PSEK subjects are above the alignments in red (d: deletion). Protein domains are outlined as follows: YxxxK, N, and S residues that form the canonical catalytic triad (orange), putative TGxxxGxG NAD binding site (green), putative transmembrane domains (blue).

**Figure S4. Immunoblotting validates depletion of endogenous yeast *TSC10* and expression of plasmid-borne *TSC10* and *KDSR* for yeast complementation studies**

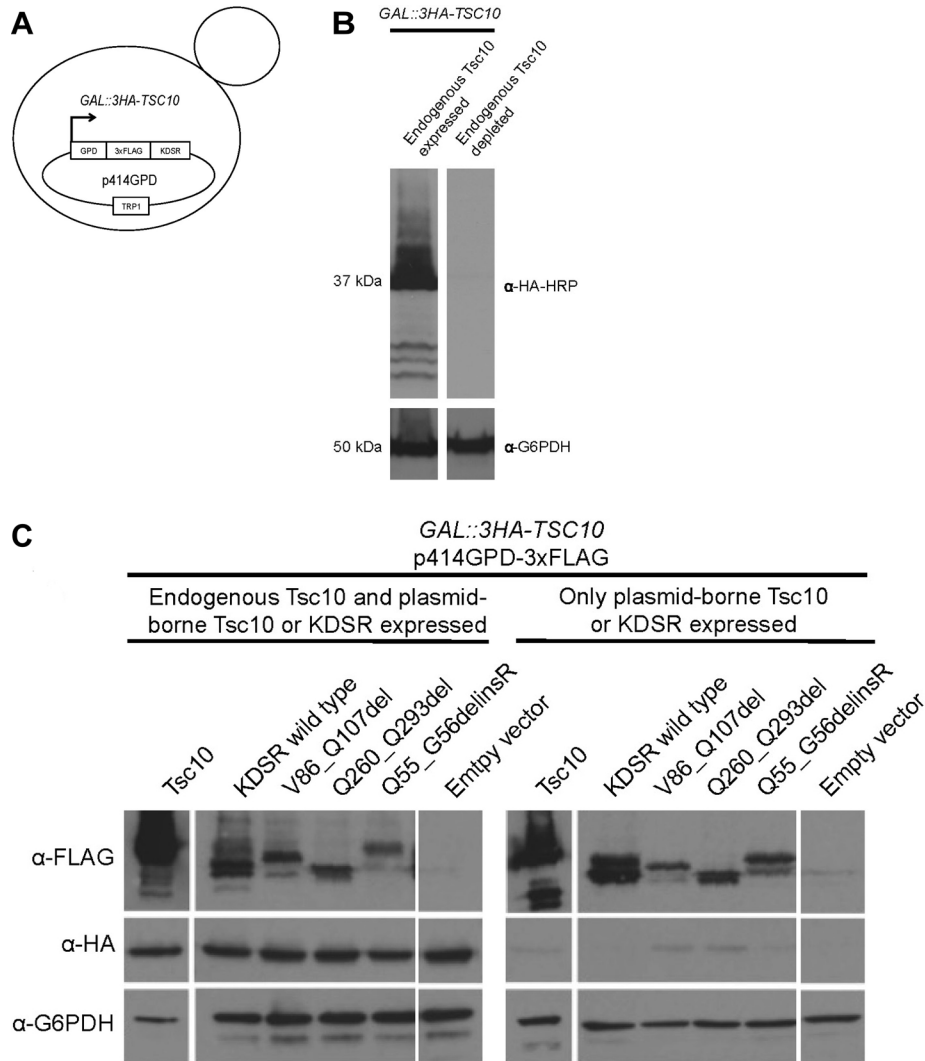

(A) Schematic depicting haploid yeast strains constructed to test the depletion of endogenous *TSC10* and complementation by yeast *TSC10*, wild-type *KDSR*, and mutant forms of *KDSR*. *TSC10* was placed under the control of a galactose-inducible and glucose-repressible promoter (*GAL*), and sequences encoding 3xHA tags were introduced. Wild-type and mutant genes were introduced via plasmids (p414GPD).

(B) Protein extracts before and after *TSC10* depletion were analyzed by Western blot with α-HA-HRP to detect tagged Tsc10 before and after depletion. Anti-G6PDH was used as a loading control.

(C) Western blots showing immunostaining for plasmid-borne Tsc10 or KDSR (α-FLAG), endogenous Tsc10 (α-HA), or loading control (α-G6PDH) in the presence and absence of endogenous yeast Tsc10. Left panels: Yeast were grown at 30 °C in SG/R-W (endogenous *TSC10* and plasmid-borne *TSC10* or *KDSR* expressed). Right panels: Yeast were first grown to mid-log phase in SG/R-W at 30 °C before being shifted to SD-W (only plasmid-borne *TSC10* or *KDSR* expressed) for six hours at 30 °C. The empty vector serves as a negative control.

**Figure S5. Systemic retinoids improve skin phenotype**

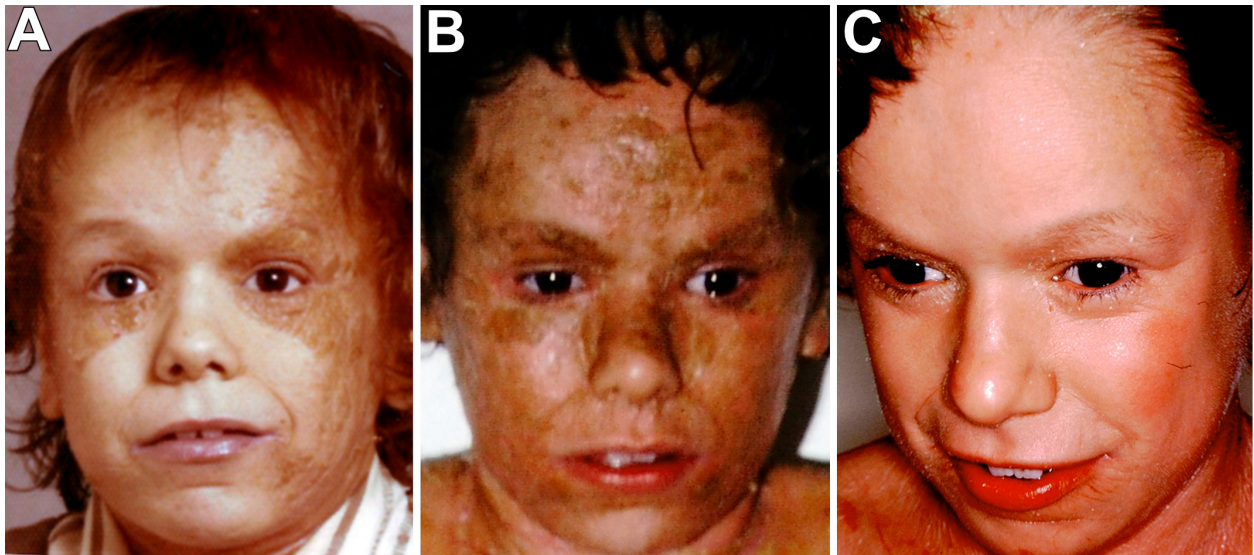

In two of our four subjects, systemic retinoids have been administered and have led to a marked improvement of hyperkeratosis.

(A) Subject 438 at five years of age shows prominent, well-demarcated plaques on the cheeks, temples and central forehead.

(B) At 9 years of age, these have extended to involve more of the face with sparing of the chin.

(C) After 6 months of isotretinoin at 1mg/kg/day, she has experienced near-complete clearing of facial hyperkeratosis.

**Table S1. Exome sequence coverage**

|                          | Kindred 429 |        |        | Kindred 101 |        |        | Kindred 1107 |        |        | Kindred 438 |        |        |
|--------------------------|-------------|--------|--------|-------------|--------|--------|--------------|--------|--------|-------------|--------|--------|
|                          | Proband     | Mother | Father | Proband     | Mother | Father | Proband      | Mother | Father | Proband     | Mother | Father |
| Number of reads          | 58M         | 76M    | 79M    | 73M         | 66M    | 128M   | 35M          | 39M    | 31M    | 73M         | 91M    | 97M    |
| Mean coverage            | 50x         | 62x    | 67x    | 64x         | 58x    | 111x   | 29x          | 31x    | 27x    | 61x         | 74x    | 80x    |
| Median coverage          | 42x         | 50x    | 52x    | 53x         | 48x    | 93x    | 24x          | 27x    | 23x    | 50x         | 58x    | 63x    |
| Bases covered $\geq$ 8x  | 85%         | 87%    | 87%    | 86%         | 86%    | 89%    | 82%          | 95%    | 94%    | 86%         | 88%    | 88%    |
| Bases covered $\geq$ 20x | 74%         | 78%    | 78%    | 78%         | 76%    | 84%    | 59%          | 71%    | 62%    | 77%         | 80%    | 82%    |

**Table S2. Exome sequence data at *KDSR* mutation sites**

|                               | Subject 429                      | Subject 101                       | Subject 1107                      | Subject 438            |
|-------------------------------|----------------------------------|-----------------------------------|-----------------------------------|------------------------|
| <b><i>KDSR</i> mutation 1</b> |                                  |                                   |                                   |                        |
| DNA change                    | c.879G>A                         | c.879G>A                          | c.879G>A                          | c.557A>T               |
| Protein change                | p. Gln293Gln, p.Gln260_Gln293del | p. Gln293Gln, p. Gln260_Gln293del | p. Gln293Gln, p. Gln260_Gln293del | p.Tyr186Phe            |
| Exon                          | 9                                | 9                                 | 9                                 | 6                      |
| Genomic location              | chr18:63,335,257                 | chr18:63,335,257                  | chr18:63,335,257                  | chr18:63,350,940       |
| Non-Ref/Total reads (proband) | 22/59                            | 34/82                             | 20/42                             | 36/63                  |
| Non-Ref/Total reads (mother)  | 38/81                            | 0/52                              | 0/35                              | 32/59                  |
| Non-Ref/Total reads (father)  | 0/75                             | 54/111                            | 20/32                             | 0/73                   |
| <b><i>KDSR</i> mutation 2</b> |                                  |                                   |                                   |                        |
| DNA change                    | c.164_166delAAG                  | c.256-2A>C                        | none observed in exome            | none observed in exome |
| Protein change                | p.Gln55_Gly56delinsArg           | p.Val86_Gln107del                 |                                   |                        |
| Exon                          | 2                                | 4                                 |                                   |                        |
| Genomic location              | chr18:63,362,811-813             | chr18:63,355,565                  |                                   |                        |
| Non-Ref/Total reads (proband) | 39/73                            | 49/97                             |                                   |                        |
| Non-Ref/Total reads (mother)  | 0/158                            | 42/81                             |                                   |                        |
| Non-Ref/Total reads (father)  | 71/160                           | 0/164                             |                                   |                        |

*KDSR* cDNA positions: RefSeq accession NM\_002035.2.

*KDSR* protein positions: RefSeq accession NP\_002026.1.

*KDSR* exon positions: RefSeq accession NG\_028249.1.

Genomic location: DNA base(s), hg38 version of the human genome.

Non-Ref reads: The number of exome sequence reads with the non-reference (mutant) base(s).

Total reads: The total number of exome sequence reads.



**Table S3. SNP rs62098681 in Subjects 1107 and 438**

|                               | Kindred 1107 | Kindred 438 |
|-------------------------------|--------------|-------------|
| <u>rs62098681</u>             |              |             |
| Non-Ref/Total reads (proband) | 0/1          | 1/1         |
| Non-Ref/Total reads (mother)  | 2/5          | 0/0         |
| Non-Ref/Total reads (father)  | 0/4          | 4/4         |

rs62098681: An intronic SNP 166 bp downstream from *KDSR* exon 1 (c.108+166C>T, hg38 position chr18:63,366,845) with a minor allele frequency of 0.01.

Non-Ref reads: The number of exome sequence reads with the non-reference (mutant) base(s).

Total reads: The total number of exome sequence reads.

Red lettering: Reads indicating that rs62098681 is present in the parent in which a damaging *KDSR* mutation was not revealed by exome sequencing.

Note: Given the low level of exome coverage at this site, Sanger sequencing was used to show that Subject 1107 and his mother, and Subject 438 and her father, are heterozygous for rs62098681.
